# Supplementary material for: Mesopore-dominant wormhole-like carbon with high supercapacitive performance in organic electrolyte
Source: Royal Society of Chemistry journal article supplement (doi:10.1039/c7ra00446j), 2017-01-01
Supplement: c7ra00446j1.pdf [file c7ra00446j1.pdf]

## Supplementary Information

### Mesopore-dominant wormholelike carbon with high supercapacitive performance in organic electrolyte

Xiaoqing Yang\*, Jianlin Yu, Weijian Zhang, Guoqing Zhang

*School of Materials and Energy, Guangdong University of Technology, Guangzhou  
510006, PR China*

Table S1 Desolvated and solvated ion sizes of different electrolyte.<sup>1,2</sup>

| Ion type                 | TEA <sup>+</sup> | BF <sub>4</sub> <sup>-</sup> | K <sup>+</sup> | OH <sup>-</sup> | SO <sub>4</sub> <sup>-</sup> | H <sup>+</sup> |
|--------------------------|------------------|------------------------------|----------------|-----------------|------------------------------|----------------|
| Desolvated ion size (nm) | 0.67             | 0.48                         | 0.27           | 0.35            | 0.58                         | --             |
| Solvated ion size (nm)   | 1.3              | 1.2                          | 0.66           | 0.6             | 0.76                         | 0.56           |

---

\* Corresponding author.  
E-mail addresses: [yxq-886@163.com](mailto:yxq-886@163.com) (X. Yang)

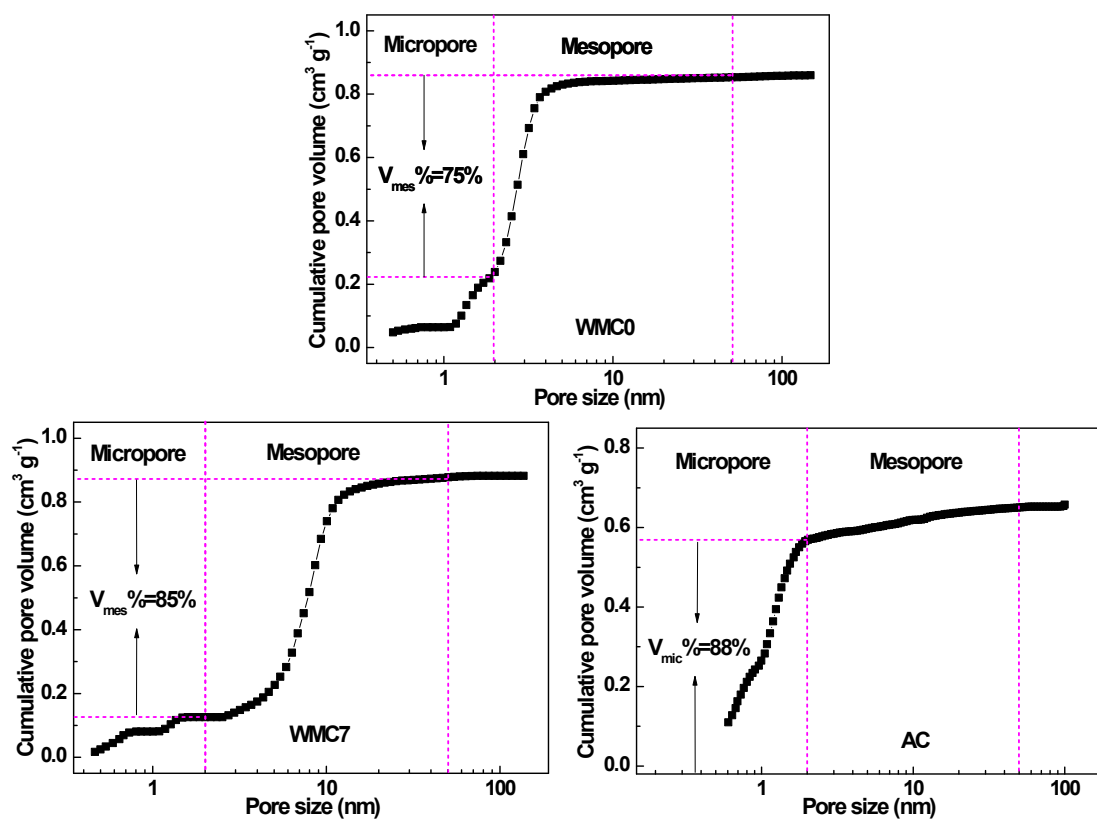

Figure S1. DFT cumulative pore volume curves of the samples.

## References

1. E. Nightingale Jr, *The Journal of Physics and Chemistry*, 1959, 63, 1381–1387;
2. J. Chmiola, C. Largeot, P.-L. Taberna, P. Simon and Y. Gogotsi, *Angewandte Chemie-International Edition*, 2008, 47, 3392-3395.
